# Supplementary material for: Vadose zone modeling to identify controls on groundwater recharge in an unconfined granular aquifer in a cold and humid environment with different meteorological data sources
Source: Springer Nature journal article supplement (doi:10.1007/s10040-021-02429-6), 2021-12-28
Supplement: MOESM1 [file 19977122]

## Electronic Supplementary Materials – Hydrogeology Journal

### **Vadose zone modeling to identify controls on groundwater recharge in an unconfined granular aquifer in a cold and humid environment with different meteorological data sources**

Sabrina Bruneau<sup>1,2\*</sup>, Florent Barbecot<sup>1,2</sup>, Marie Larocque<sup>1,2,3</sup>, Viorel Horoi<sup>1</sup>

<sup>1</sup> Département des sciences de la Terre et de l'atmosphère - Université du Québec à Montréal, C.P. 8888, Succ. Centre-Ville, Montréal (QC), Canada, H3C 3P8

<sup>2</sup> GEOTOP Research Center - Université du Québec à Montréal, C.P. 8888, Succ. Centre-Ville, Montréal (QC), Canada;

<sup>3</sup> GRIL Research Center - Université du Québec à Montréal, C.P. 8888, Succ. Centre-Ville, Montréal (QC), Canada;

<sup>4</sup> UMR 1402 ECOSYS, AgroParisTech, INRAE, Université Paris Saclay, 78850 Thiverval-Grignon, France

<sup>5</sup> MINES ParisTech, Centre de Géosciences, PSL Research University, 35 rue Saint Honoré, 77300 Fontainebleau, France

\*corresponding author : [sabrina.bruneau.f@gmail.com](mailto:sabrina.bruneau.f@gmail.com)

**Table S1** Range of VWC values monitored and simulated by each sensor at the three sites

|             |             | <b>Observed</b> |              |              |               | <b>Simulated</b> |              |              |               |
|-------------|-------------|-----------------|--------------|--------------|---------------|------------------|--------------|--------------|---------------|
| <b>SLZA</b> |             | <b>10 cm</b>    | <b>20 cm</b> | <b>50 cm</b> | <b>100 cm</b> | <b>10 cm</b>     | <b>20 cm</b> | <b>50 cm</b> | <b>100 cm</b> |
|             | <b>Min</b>  | 0.017           | 0.000        | 0.070        | 0.027         | 0.074            | 0.032        | 0.077        | 0.026         |
|             | <b>Max</b>  | 0.186           | 0.079        | 0.101        | 0.056         | 0.190            | 0.089        | 0.109        | 0.079         |
|             | <b>Mean</b> | 0.120           | 0.051        | 0.083        | 0.037         | 0.118            | 0.049        | 0.083        | 0.037         |
| <b>SLZB</b> |             | <b>10 cm</b>    | <b>20 cm</b> | <b>50 cm</b> | <b>100 cm</b> | <b>10 cm</b>     | <b>20 cm</b> | <b>50 cm</b> | <b>100 cm</b> |
|             | <b>Min</b>  | 0.039           | 0.015        | 0.003        | 0.055         | 0.040            | 0.022        | 0.013        | 0.061         |
|             | <b>Max</b>  | 0.395           | 0.146        | 0.148        | 0.094         | 0.328            | 0.118        | 0.137        | 0.115         |
|             | <b>Mean</b> | 0.146           | 0.052        | 0.055        | 0.071         | 0.142            | 0.054        | 0.058        | 0.072         |
| <b>STEL</b> |             | <b>25 cm</b>    | <b>50 cm</b> | <b>75 cm</b> | <b>100 cm</b> | <b>25 cm</b>     | <b>50 cm</b> | <b>75 cm</b> | <b>100 cm</b> |
|             | <b>Min</b>  | 0.126           | 0.037        | 0.042        | 0.040         | 0.208            | 0.037        | 0.043        | 0.046         |
|             | <b>Max</b>  | 0.365           | 0.076        | 0.081        | 0.081         | 0.368            | 0.079        | 0.084        | 0.092         |
|             | <b>Mean</b> | 0.294           | 0.048        | 0.052        | 0.056         | 0.301            | 0.049        | 0.054        | 0.058         |

**Table S2** Initial van Genuchten-Mualem (VGM) parameters as input values to the vadose zone model

| <b>IRRES site</b> | <b>Depth (cm)</b> | $\theta_r$ | $\theta_s$ | $\alpha$ (1/cm) | $n$  | $K_s$ (cm/day) |
|-------------------|-------------------|------------|------------|-----------------|------|----------------|
| <b>SLZA</b>       | 0-15              | 0.040      | 0.39       | 0.043           | 2.74 | 375            |
|                   | 16-30             | 0.043      | 0.39       | 0.041           | 3.16 | 1036           |
|                   | 31-70             | 0.048      | 0.38       | 0.037           | 3.84 | 950            |
|                   | 71-300            | 0.051      | 0.38       | 0.034           | 4.42 | 950            |
| <b>SLZB</b>       | 0-15              | 0.035      | 0.39       | 0.048           | 2.22 | 216            |
|                   | 16-30             | 0.037      | 0.39       | 0.046           | 2.39 | 241            |
|                   | 31-60             | 0.044      | 0.39       | 0.040           | 3.26 | 820            |
|                   | 60-300            | 0.051      | 0.38       | 0.034           | 4.42 | 950            |
| <b>STEL</b>       | 0-40              | 0.034      | 0.40       | 0.049           | 2.08 | 362            |
|                   | 41-65             | 0.046      | 0.38       | 0.039           | 3.49 | 1296           |
|                   | 66-80             | 0.046      | 0.38       | 0.039           | 3.49 | 1296           |
|                   | 81-300            | 0.050      | 0.38       | 0.035           | 4.21 | 1900           |

**Table S3** Calibration bounds for the van Genuchten-Mualem (VGM) parameters used in model calibration

| <b>IRRES site</b> | <b>Layer</b> | <b><math>\theta r</math> (-)</b> | <b><math>\theta s</math> (-)</b> | <b><math>\alpha</math> (1/cm)</b> | <b><math>n</math> (-)</b> | <b><math>K_s</math> (cm/day)</b> | <b><math>l</math> (-)</b> |
|-------------------|--------------|----------------------------------|----------------------------------|-----------------------------------|---------------------------|----------------------------------|---------------------------|
| <b>SLZA</b>       | 1            | 0.001-0.1                        | -                                | 0.01-0.40                         | 1.1-3.0                   | 100-700                          | -1 to 1                   |
|                   | 2            | 0.001-0.1                        | -                                | 0.01-0.40                         | 1.1-4.5                   | 700-2000                         | -1 to 1                   |
|                   | 3            | 0.001-0.1                        | -                                | 0.01-0.50                         | 2.0-4.5                   | 700-2000                         | -1 to 1                   |
|                   | 4            | 0.001-0.1                        | -                                | 0.01-0.50                         | 2.0-4.5                   | 700-2000                         | -1 to 1                   |
| <b>SLZB</b>       | 1            | 0.001-0.05                       | 0.39-0.60                        | 0.01-0.40                         | 1.1-3.5                   | 100-500                          | -1 to 1                   |
|                   | 2            | 0.001-0.05                       | -                                | 0.01-0.40                         | 1.1-3.5                   | 100-1000                         | -1 to 1                   |
|                   | 3            | 0.001-0.05                       | -                                | 0.01-0.40                         | 1.5-4.5                   | 500-1500                         | -1 to 1                   |
|                   | 4            | 0.001-0.1                        | -                                | 0.01-0.40                         | 2.0-4.5                   | 500-2000                         | -1 to 1                   |
| <b>STEL</b>       | 1            | 0.01-0.20                        | 0.35-0.50                        | 0.005-0.5                         | 1.1-3.5                   | 100-700                          | -1 to 1                   |
|                   | 2            | 0.001-0.05                       | -                                | 0.01-0.40                         | 3.0-4.5                   | 700-2500                         | -1 to 1                   |
|                   | 3            | 0.001-0.05                       | -                                | 0.01-0.40                         | 3.0-4.5                   | 700-2500                         | -1 to 1                   |
|                   | 4            | 0.001-0.05                       | -                                | 0.01-0.40                         | 3.0-4.5                   | 700-2500                         | -1 to 1                   |

**Table S1** Optimized van Genuchten-Mualem (VGM) parameters for the three sites at each soil layer defined in the model

| <b>IRRES site</b> | <b>depth (cm)</b> | $\theta_r$ (-) | $\theta_s$ (-) | $\alpha$ (1/cm) | $n$ (-) | $K_s$ (cm/day) | $l$ (-) |
|-------------------|-------------------|----------------|----------------|-----------------|---------|----------------|---------|
| <b>SLZA</b>       | 0-15              | 0.073          | 0.390          | 0.075           | 1.94    | 161            | 0.049   |
|                   | 16-30             | 0.032          | 0.387          | 0.036           | 3.54    | 1714           | 0.068   |
|                   | 31-70             | 0.076          | 0.382          | 0.033           | 4.5     | 1782           | 0.418   |
|                   | 71-300            | 0.020          | 0.376          | 0.023           | 3.82    | 1350           | 0.311   |
| <b>SLZB</b>       | 0-15              | 0.040          | 0.442          | 0.020           | 3.32    | 160            | 0.024   |
|                   | 16-30             | 0.022          | 0.393          | 0.048           | 2.55    | 400            | 0.474   |
|                   | 31-60             | 0.004          | 0.386          | 0.035           | 2.75    | 508            | 0.523   |
|                   | 60-300            | 0.058          | 0.376          | 0.034           | 4.39    | 1154           | 0.502   |
| <b>STEL</b>       | 0-40              | 0.011          | 0.378          | 0.041           | 1.12    | 143            | 1       |
|                   | 41-65             | 0.037          | 0.385          | 0.029           | 4.15    | 2498           | 0.001   |
|                   | 66-80             | 0.042          | 0.385          | 0.034           | 4.38    | 2373           | 0.010   |
|                   | 81-300            | 0.043          | 0.379          | 0.038           | 4.47    | 2497           | 0.857   |

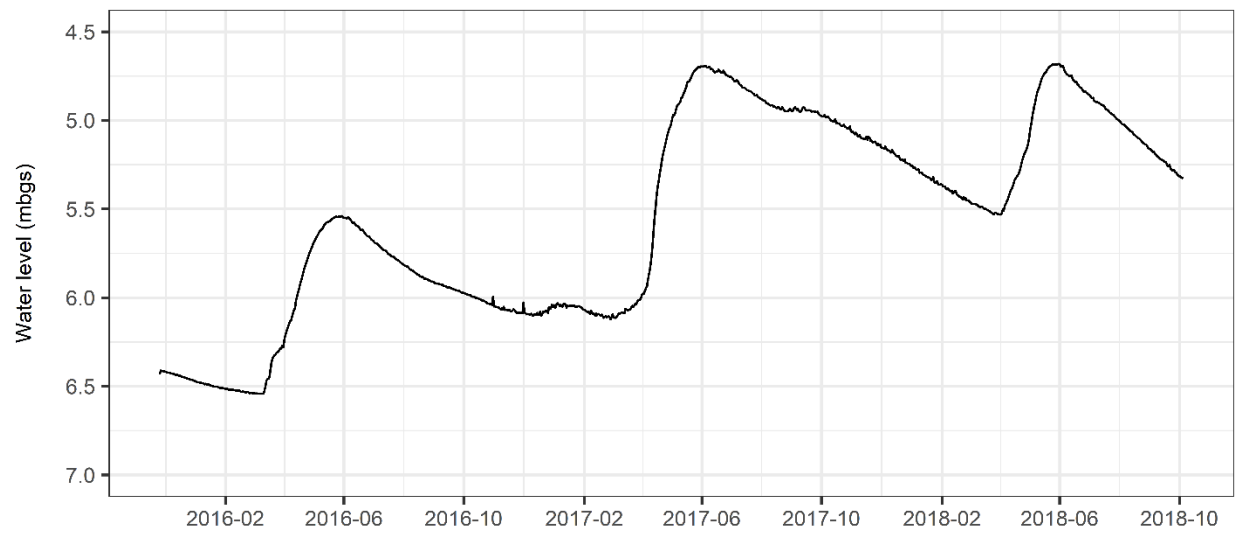

**Fig. S1** Measured groundwater levels (depth below the ground surface) at the SLZ site from 2016 to 2018

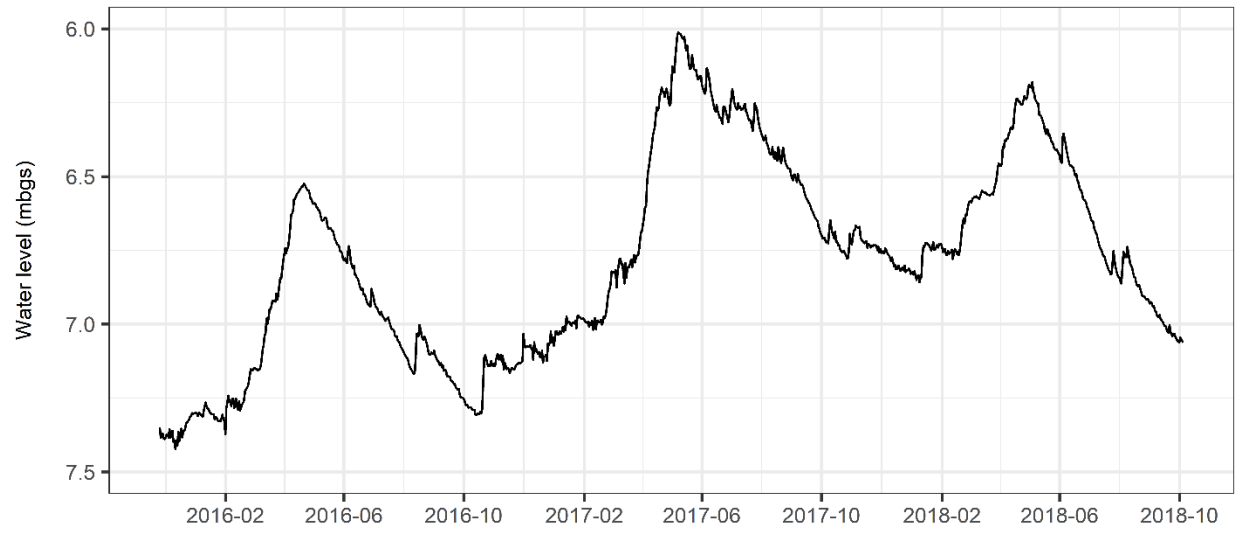

**Fig. S2** Measured groundwater levels (depth below the ground surface) at the STEL site from 2016 to 2018
